# Supplementary material for: Tuning the mechanical and morphological properties of self-assembled peptide hydrogels via control over the gelation mechanism through regulation of ionic strength and the rate of pH change
Source: Royal Society of Chemistry journal article supplement (doi:10.1039/c4ra13266a), 2014-11-20
Supplement: c4ra13266a1.pdf [file c4ra13266a1.pdf]

### Supplementary Information

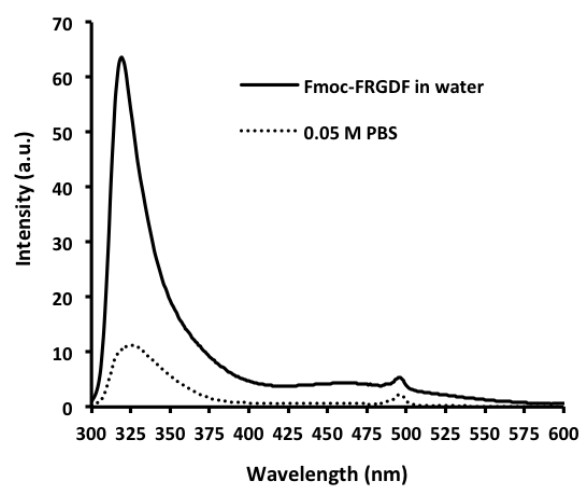

**Supplementary Figure 1** Fluorescence spectrum of Fmoc-FRGDF hydrogel.
